# Supplementary material for: Chlorpromazine and Amitriptyline Are Substrates and Inhibitors of the AcrB Multidrug Efflux Pump
Source: PubMed Central journal article supplement (PMC7267879; doi:10.1128/mbio.00465-20), 2020-06-02

Figure S1

A)

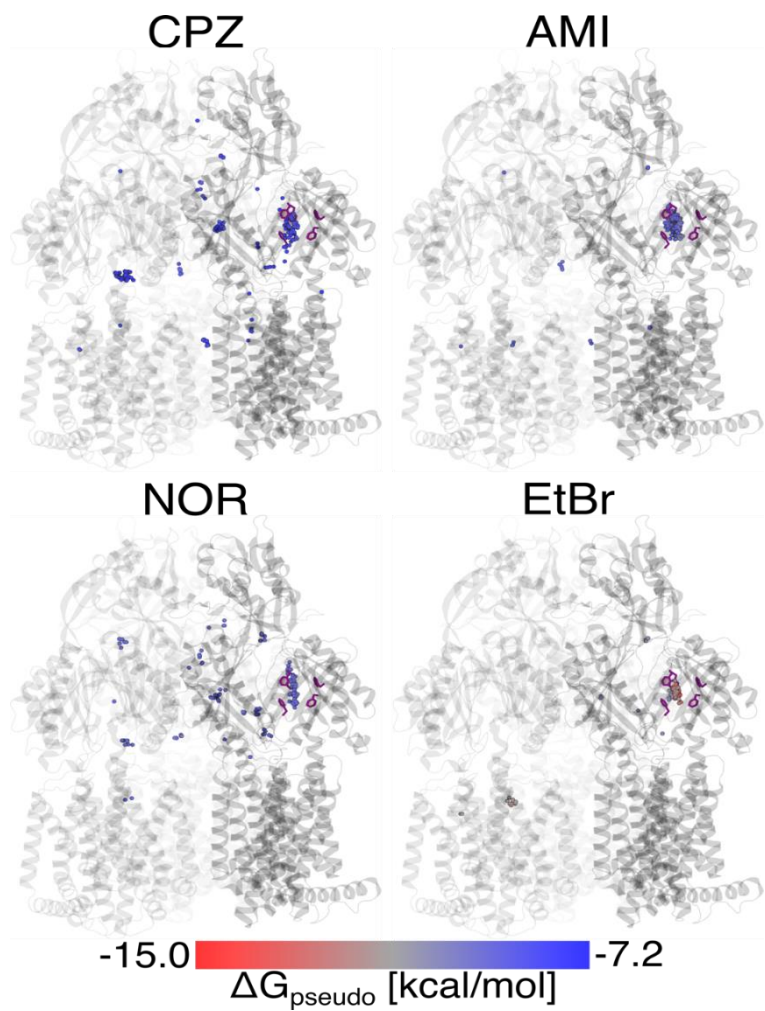

B)

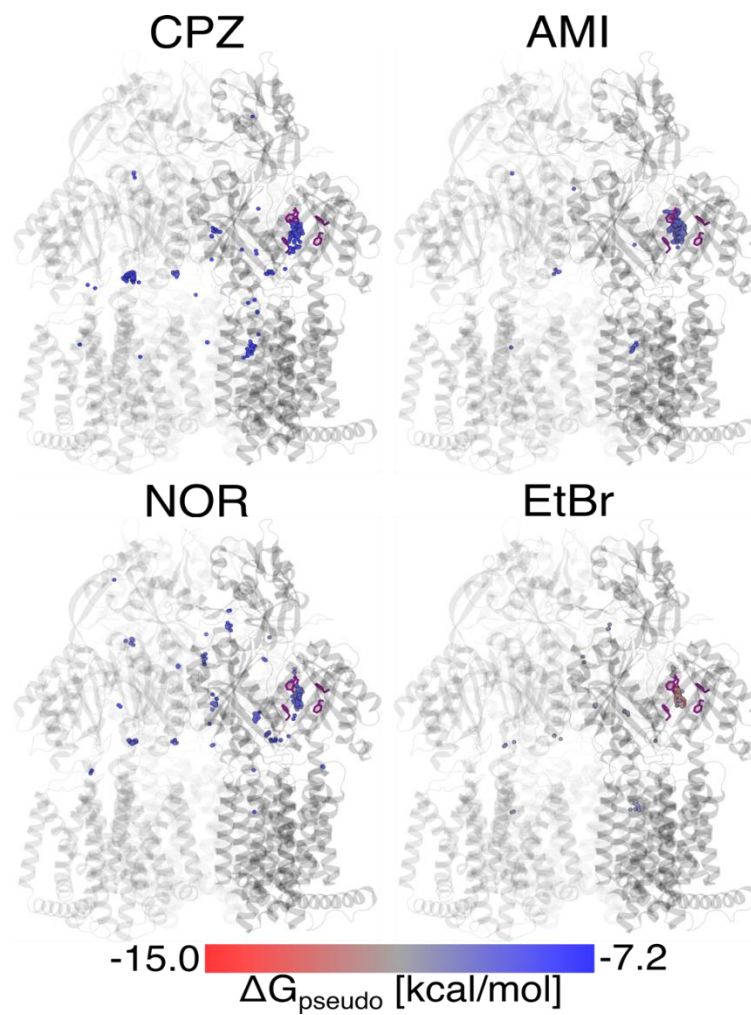

Supplement: mBio.00465-20-sf001.pdf [file mBio.00465-20-sf001.pdf]
