# Supplementary material for: Chlorpromazine and Amitriptyline Are Substrates and Inhibitors of the AcrB Multidrug Efflux Pump
Source: PubMed Central journal article supplement (PMC7267879; doi:10.1128/mbio.00465-20), 2020-06-02
Supplement: mBio.00465-20-st002.pdf [file mBio.00465-20-st002.pdf]

**Supplementary Table 2**

| Substrate | Number of MD simulations |                 |
|-----------|--------------------------|-----------------|
|           | <i>E. coli</i>           | <i>S. Typh.</i> |
| AMI       | 3                        | 3               |
| CPZ       | 3                        | 3               |
| NOR       | 3                        | 3               |
| EtBr      | 3                        | 3               |
