# Supplementary material for: Chlorpromazine and Amitriptyline Are Substrates and Inhibitors of the AcrB Multidrug Efflux Pump
Source: PubMed Central journal article supplement (PMC7267879; doi:10.1128/mbio.00465-20), 2020-06-02
Supplement: mBio.00465-20-st003.pdf [file mBio.00465-20-st003.pdf]

**Supplementary Table 3**

|                          |                                                                                              |
|--------------------------|----------------------------------------------------------------------------------------------|
| AMI – AcrB <sub>EC</sub> | E130 (69.3%), Q176 (60.0%), water-mediated interactions (4.7%)                               |
| AMI – AcrB <sub>ST</sub> | E130 (67.1%), Q176 (64.8%), water-mediated interactions (4.6%)                               |
| CPZ – AcrB <sub>EC</sub> | S133 (82.7%), S134 (58.9%), water-mediated interactions (17.5%)                              |
| CPZ – AcrB <sub>ST</sub> | S134 (52.0%), S135 (44.0%), F136* (10.0%), F617* (9.8%), water-mediated interactions (10.0%) |
